# Supplementary material for: Safety and efficacy of losartan for the reduction of brain atrophy in clinically diagnosed Alzheimer's disease (the RADAR trial): a double-blind, randomised, placebo-controlled, phase 2 trial
Source: PubMed Central journal article supplement (PMC8528717; doi:10.1016/s1474-4422(21)00263-5), 2021-11
Supplement: mmc1.pdf [file mmc1.pdf]

# THE LANCET

## Neurology

### Supplementary appendix

This appendix formed part of the original submission and has been peer reviewed. We post it as supplied by the authors.

Supplement to: Kehoe PG, Turner N, Howden B, et al. Safety and efficacy of losartan for the reduction of brain atrophy in clinically diagnosed Alzheimer's disease (the RADAR trial): a double-blind, randomised, placebo-controlled, phase 2 trial. *Lancet Neurol* 2021; **20**: 895–906.

## Supplemental Tables

to

Safety and efficacy of losartan for the reduction of brain atrophy in clinically diagnosed Alzheimer's disease (the RADAR trial): a phase 2 double blind, randomised, placebo-controlled trial

| Contents                                                                                                     | Page Number |
|--------------------------------------------------------------------------------------------------------------|-------------|
| Supplemental Table 1 – Summary of Amendments to Protocol                                                     | 1           |
| Supplemental Table 2 - Comparisons of primary outcome according to Hippocampal and Lateral Ventricle volumes | 3           |
| Supplemental Table 3 - Serious Adverse Events (SAE) according to Treatment Arm                               | 4           |

### Supplemental Table 1 – Summary of Amendments to Protocol

| Trial Amendment Type & Number                                                                                 | Protocol Version No. | Date Issued | Author(s) of changes | Summary of changes made                                                                                                                                                     |
|---------------------------------------------------------------------------------------------------------------|----------------------|-------------|----------------------|-----------------------------------------------------------------------------------------------------------------------------------------------------------------------------|
| Substantial Amendment 1 (S/A1)                                                                                | 3.0                  | 03/06/2013  | Patrick Kehoe        | Revisions made for clarity and to ensure consistency with the sponsor's SOPs and previous recommendations made by the ethics committee<br>See S/A1 summary dated 03/06/2013 |
| Substantial Amendment 2 (S/A2)                                                                                | 4.0                  | 18/07/2013  | Patrick Kehoe        | Addition of information pertaining to pilot imaging procedures                                                                                                              |
| Minor Amendment 2                                                                                             | 4.1                  | 23/07/2013  | Patrick Kehoe        | Minor clarifications added after review by TSC, DMEC and TMG                                                                                                                |
| Substantial Amendment 3 (S/A3)                                                                                | 5.0                  | 28/11/2013  | Patrick Kehoe        | Change to minimisation details and eligibility criteria. Clarification that an additional phonecall is required to provide the outcome of the screening blood test.         |
| Minor Amendment 3                                                                                             | 5.1                  | 09/04/2014  | Patrick Kehoe        | Minor corrections to ensure consistency with other documentation/text e.g. timing of blood tests                                                                            |
| Substantial amendment 6 (S/A 6)<br><u>NB</u> substantial amendments 4&5 were approved by the MHRA only due to | 6.0                  | 07/10/2014  | Patrick Kehoe        | Removal of exclusion criteria for severe hippocampal atrophy and inclusion of option to recruit via primary care.                                                           |

|                                                      |      |            |               |                                                                                                                                                                                                                                                                                                                                                                        |
|------------------------------------------------------|------|------------|---------------|------------------------------------------------------------------------------------------------------------------------------------------------------------------------------------------------------------------------------------------------------------------------------------------------------------------------------------------------------------------------|
| change in brand of the IMP and shelf-life extension. |      |            |               |                                                                                                                                                                                                                                                                                                                                                                        |
| Minor Amendment 4                                    | 6.0  | 07/10/2014 | Patrick Kehoe | Submission for review of revised poster to be used in recruitment from primary care.                                                                                                                                                                                                                                                                                   |
| Minor Amendment 5                                    | 6.1  | 14/11/2014 | Patrick Kehoe | Removal of residual references in protocol text and Appendix I of protocol to severe hippocampal atrophy as exclusion criteria that were missed in Substantial amendment 6 (S/A 6)                                                                                                                                                                                     |
| Minor Amendment 6                                    | 6.1  | 26.02.2015 | Patrick Kehoe | Formatting changes to the open label diaries for BP and medication and change to the reply slip to include GP surgery.                                                                                                                                                                                                                                                 |
| Minor Amendment 7                                    | 6.1  | 12.05.2015 | Patrick Kehoe | Inclusion of RADAR on 'Join Dementia Research' (JDR)                                                                                                                                                                                                                                                                                                                   |
| Substantial Amendment 7 (S/A7)                       | 7.0  | 03/12/2015 | Patrick Kehoe | Change of eligibility criteria for MMSE range from 18-28 to 15-28.                                                                                                                                                                                                                                                                                                     |
| Substantial Amendment 8 (S/A8)                       | 8.0  | 04.03.2016 | Patrick Kehoe | Inclusion of an embedded qualitative component.                                                                                                                                                                                                                                                                                                                        |
| Substantial Amendment 9 (S/A9)                       | 9.0  | 19.07.2017 | Patrick Kehoe | Clarification of consent process. Inclusion of SPECT as a considered scan option for screening, and similarly use of ACE-R cognitive assessment scores as a reference point for screening of potentially eligible participants. Clarification of baseline Blood pressure exclusion criteria. Clarification of assessment timings. Replace 'informant' with 'companion' |
| Substantial Amendment 10 (S/A10)                     | 10.0 | 11.10.2017 | Patrick Kehoe | Correction to blood pressure exclusion criteria section 7.2.                                                                                                                                                                                                                                                                                                           |

**Supplemental Table 2 – Comparisons of primary outcome according to Hippocampal and Lateral Ventricle volumes**

|                | Placebo  |             |           |             | Intervention |             |           |             | Regression analysis            |             |
|----------------|----------|-------------|-----------|-------------|--------------|-------------|-----------|-------------|--------------------------------|-------------|
|                | Baseline |             | 12 months |             | Baseline     |             | 12 months |             | Adjusted* mean diff<br>(95%CI) | p-<br>value |
|                | n        | Mean (SD)   | n         | Mean (SD)   | n            | Mean (SD)   | n         | Mean (SD)   |                                |             |
| <b>LHV</b>     | 106      | 2.5 (0.5)   | 87        | 2.4 (0.5)   | 105          | 2.5 (0.5)   | 84        | 2.5 (0.5)   | 0.01 (-0.01, 0.03)             | 0.337       |
| <b>LHV BSI</b> | -        | -           | 87        | 0.11 (0.06) | -            | -           | 84        | 0.11 (0.08) | -0.01 (-0.03, 0.01)            | 0.385       |
| <b>RHV</b>     | 106      | 2.6 (0.5)   | 87        | 2.5 (0.5)   | 105          | 2.6 (0.5)   | 84        | 2.6 (0.5)   | 0.01 (-0.003, 0.03)            | 0.112       |
| <b>RHV BSI</b> | -        | -           | 87        | 0.12 (0.06) | -            | -           | 84        | 0.11 (0.08) | -0.01 (-0.03, 0.01)            | 0.231       |
| <b>THV</b>     | 106      | 5.0 (1.0)   | 87        | 4.9 (0.9)   | 105          | 5.2 (0.9)   | 84        | 5.0 (0.9)   | 0.02 (-0.01, 0.05)             | 0.144       |
| <b>LHV</b>     | 106      | 47 [35, 64] | 86        | 50 [40, 67] | 105          | 48 [35, 69] | 83        | 51 [40, 78] | 0.99 <sup>+</sup> (0.98, 1.01) | 0.443       |
| <b>LHV BSI</b> | -        | -           | 86        | 5 [3, 7]    | -            | -           | 83        | 5 [3, 8]    | -0.45 (-1.45, 0.56)            | 0.380       |

Legend. LHV= left hippocampus volume; RHV= right hippocampus volume, THV= total hippocampal volume; BSI = Boundary Shift Integral; LVV = lateral ventricle volume,. \*Adjusted for minimization variables (age and Scheltens score categories), baseline value of the outcome and centre. <sup>+</sup>Ratio of geometric means.

**Supplemental Table 3 - -Serious Adverse Events (SAE) according to Treatment Arm**

| <b>SAE Number</b>                | <b>Brief Summary</b>                                                                        | <b>Arm</b>   |
|----------------------------------|---------------------------------------------------------------------------------------------|--------------|
| <b>Cancer</b>                    |                                                                                             |              |
| SAE002                           | Participant died pancreatic cancer                                                          | Placebo      |
| <b>Cardio-circulatory</b>        |                                                                                             |              |
| SAE003                           | Prolonged syncopal episode                                                                  | Placebo      |
| SAE018                           | Fainting and bradycardia                                                                    | Placebo      |
| <b>Dermatological</b>            |                                                                                             |              |
| SAE030                           | Rash around armpits and right side of the abdomen                                           | Intervention |
| <b>Endocrine and metabolic</b>   |                                                                                             |              |
| SAE013                           | Development of Diabetes                                                                     | Intervention |
| <b>Gastrointestinal</b>          |                                                                                             |              |
| SAE016                           | Constipation and prolapse                                                                   | Placebo      |
| SAE033                           | Diverticulitis                                                                              | Placebo      |
| SAE027                           | Stomach pain and breathing difficulty                                                       | Placebo      |
| SAE024                           | Urinary retention and diarrhoea and vomiting                                                | Intervention |
| <b>Haematological/thrombosis</b> |                                                                                             |              |
| SAE040                           | Admission 3 days Right sided chest pain. Discharged with anticoagulant meds.                | Placebo      |
| <b>Hepatic</b>                   |                                                                                             |              |
| SAE017                           | Collapse Raised ALT 100 (0-55)                                                              | Intervention |
| SAE023                           | Grossly raised AST serum level                                                              | Placebo      |
| SAE043                           | Safety bloods results outside of the safety range                                           | Intervention |
| <b>Infection</b>                 |                                                                                             |              |
| SAE007                           | Hospital admission. Sepsis                                                                  | Intervention |
| SAE019                           | Cellulitis left leg                                                                         | Intervention |
| SAE020                           | Cellulitis left leg flare up                                                                | Intervention |
| SAE029                           | Recurrent bronchitis                                                                        | Intervention |
| SAE039                           | Dizzy spell, tremor and cold hands. Discharged with antibiotics.                            | Intervention |
| SAE041                           | Chest infection                                                                             | Placebo      |
| SAE042                           | Lower respiratory tract infection                                                           | Intervention |
| <b>Mechanical injury</b>         |                                                                                             |              |
| SAE006                           | Fall                                                                                        | Placebo      |
| SAE008                           | Fainting                                                                                    | Placebo      |
| SAE010                           | Participant died. Admitted with femur fracture, dehydration and anaemia. Unrelated to trial | Intervention |
| SAE011                           | Fall                                                                                        | Intervention |
| SAE014                           | Fainting                                                                                    | Intervention |
| SAE021                           | Falls                                                                                       | Intervention |
| SAE035                           | Fall                                                                                        | Placebo      |

Continued on next page

Continued from previous page

| <b>SAE Number</b>       | <b>Brief Summary</b>                                          | <b>Arm</b>   |
|-------------------------|---------------------------------------------------------------|--------------|
| <b>Neuropsychiatric</b> |                                                               |              |
| SAE012                  | Found slumped on sofa unable to sit up, visual hallucinations | Placebo      |
| SAE004                  | Seizures                                                      | Intervention |
| SAE026                  | Seizure                                                       | Placebo      |
| SAE032                  | Vivid delusions and aggressive outburst                       | Placebo      |
| SAE034                  | Temp admission to Dementia Assessment Unit                    | Intervention |
| <b>Other</b>            |                                                               |              |
| SAE031                  | Ankle swelling (oedema)                                       | Placebo      |
| SAE001                  | Brain pathology                                               | Intervention |
| SAE005                  | Persistent nausea, dizziness and headache                     | Placebo      |
| SAE009                  | Mobility problems and unable to get out of bath               | Intervention |
| SAE015                  | Overdose of dementia medication                               | Intervention |
| SAE025                  | Food poisoning                                                | Intervention |
| SAE028                  | Collapse                                                      | Intervention |
| SAE036                  | Elective surgery (throat biopsy)                              | Placebo      |
| SAE037                  | Hospital admission knee pain. Arthritis                       | Placebo      |
| SAE038                  | Collapse without loss of consciousness                        | Placebo      |
| <b>Renal</b>            |                                                               |              |
| SAE022                  | Increased creatinine                                          | Open Label   |
